# Supplementary material for: Sustainable hierarchically porous carbons from bio-oil to remove emerging contaminants
Source: Royal Society of Chemistry journal article supplement (doi:10.1039/d3nj05047e), 2024-01-01
Supplement: d3nj05047e1.pdf [file d3nj05047e1.pdf]

## Supplementary Material

### Sustainable hierarchically porous carbons from bio-oil to remove emerging contaminant

Rubens Lucas de Freitas Filho<sup>1</sup>, Lucas Coelho Oliveira<sup>1</sup>, Ingrid Fernandes Silva<sup>2</sup>, Vitor Fernandes<sup>1</sup>, Ana Paula de Carvalho Teixeira<sup>1</sup>.

<sup>1</sup> Departamento de Química, ICEX, Universidade Federal de Minas Gerais, UFMG, Belo Horizonte, MG 31270-901, Brazil.

<sup>2</sup> Department of Colloid Chemistry, Max Planck Institute of Colloids and Interfaces, Potsdam Science Park, Am Mühlenberg 1, 14476 Potsdam, Germany.

#### 1. Additional information: Materials and methods

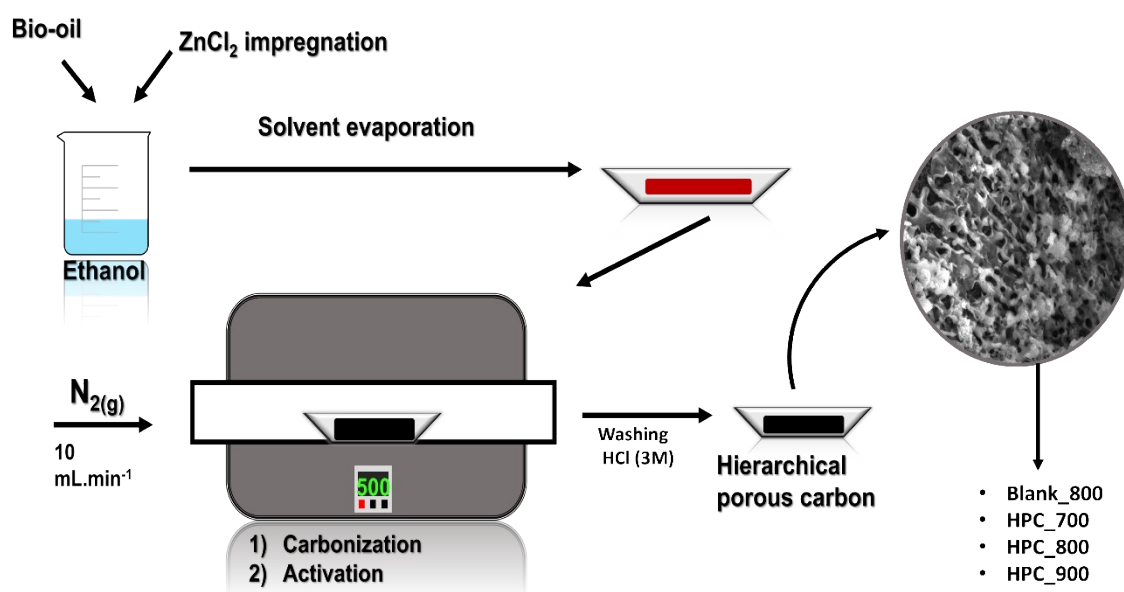

**Figure S1** - Schematic representation of the hierarchical porous carbon synthesis from bio-oil as biomass.

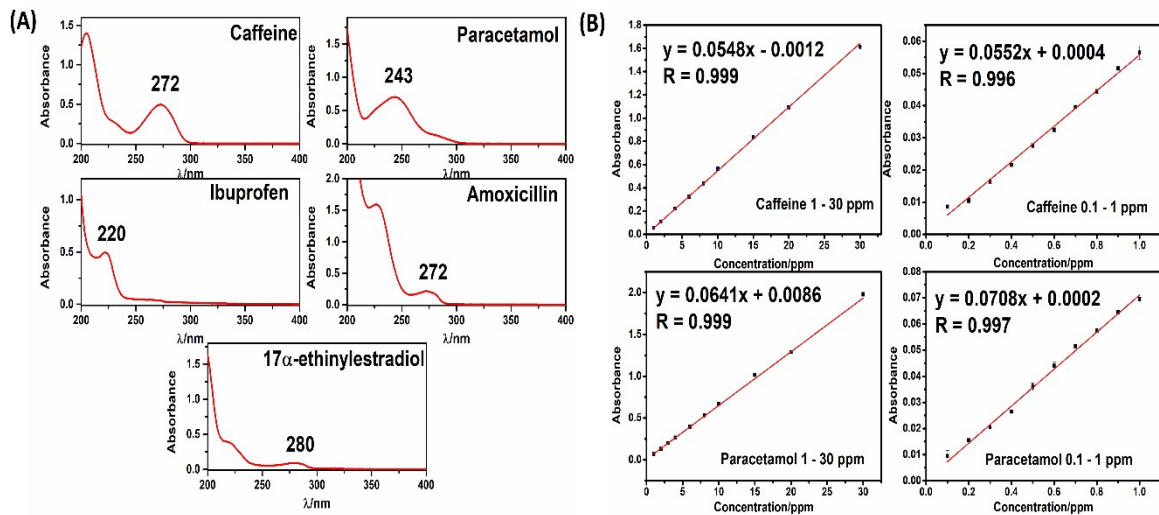

**Figure S2** UV-Vis spectra of emerging contaminants (a) and analytical curve for the contaminants caffeine and paracetamol (b).

## 2. Experimental Section

### 2.1. Kinetics and Isotherms studies

The kinetic study was performed to PAR and CAF under same conditions of mass, volume and concentration as the contact test, between 1 minute and 24 hours. The pseudo-first-order, pseudo-second-order and Elovich models were applied to understand adsorption kinetics (Equations 1, 2 and 3 respectively)<sup>1-6</sup>.

$$q_t = q_e(1 - e^{-K_1 t}) \quad (1)$$

$$q_t = \frac{q_e^2 K_2 t}{1 + q_e K_2 t} \quad (2)$$

$$q_t = \frac{1}{\beta} \ln(1 + \alpha \beta t) \quad (3)$$

where  $t$  is time (min),  $K_1$  is the pseudo-first order adsorption rate constant ( $\text{min}^{-1}$ ),  $K_2$  is the pseudo-second model adsorption rate constant ( $\text{g.mg}^{-1}.\text{min}^{-1}$ ),  $q_e$  is the amount adsorbed at equilibrium ( $\text{mg.g}^{-1}$ ),  $q_t$  is the amount adsorbed at time  $t$  (min).  $\alpha$  and  $\beta$  are Elovich constants ( $\text{mg.g}^{-1}.\text{min}^{-1}$ ) ( $\text{g.mg}^{-1}$ ) respectively.

The isotherm study was performed under same conditions of mass, volume, stirring, with the variation of concentration from 10 ppm to 1000 ppm of CAF and PAR. The system was stirred for 3 h at 21 °C. The experimental data were fitted using Langmuir, Freundlich and Sips isotherms models (Equations 5, 6 and 7 respectively).<sup>7-9</sup>

$$q_e = \frac{q_m K_L C_e}{1 + K_L C_e} \quad (4)$$

$$q_e = K_F C_e^{1/n_F} \quad (5)$$

$$q_e = \frac{q_m K_S C_e^{1/n_S}}{1 + K_S C_e^{1/n_S}} \quad (6)$$

where  $q_e$  is the amount of contaminant adsorbed ( $\text{mg.g}^{-1}$ ) at equilibrium,  $Q_m$  is the maximum adsorption capacity of a monolayer ( $\text{mg.g}^{-1}$ ),  $K_L$  is the Langmuir constant ( $\text{L.mg}^{-1}$ ),  $C_e$  is the concentration of contaminant at equilibrium ( $\text{mg.L}^{-1}$ ),  $K_F$  ( $\text{mg}^{1-(1/n_F)}.\text{L}^{1/n_F}.\text{g}^{-1}$ ) is the Freundlich constant relating to the relative capacity of adsorption ( $\text{mg.g}^{-1}$ ),  $n_F$  is a constant relating to the intensity of adsorption,  $K_S$  is the Sips adsorption constant ( $\text{L.mg}^{-1}$ ) $^{1/n_S}$ , and  $1/n_S$  is the Sips exponent (non-dimensional).

### 3. Supplementary Figures and Tables from the characterization

#### Tables

Table S1. Adjustment results from the BET method for all materials. Selecting range: 0.05 to 0.25 p.p<sub>0</sub><sup>-1</sup>.

|                  | <b>S<sub>BET</sub>/m<sup>2</sup>. g<sup>-1</sup></b> | <b>Intercept/g<sup>-1</sup></b> | <b>Slope/g<sup>-1</sup></b> | <b>R</b> | <b>C constant</b> |
|------------------|------------------------------------------------------|---------------------------------|-----------------------------|----------|-------------------|
| <b>Blank_800</b> | 0.993                                                | 4.45x10 <sup>-2</sup>           | 3062.597                    | 0.998    | 7.881             |
| <b>HPC_700</b>   | 831.754                                              | 9.896x10 <sup>-3</sup>          | 4.177                       | 0.999    | 423.091           |
| <b>HPC_800</b>   | 835.779                                              | 1.22x10 <sup>-2</sup>           | 4.155                       | 0.999    | 341.565           |
| <b>HPC_900</b>   | 764.455                                              | 1.33x10 <sup>-2</sup>           | 4.542                       | 0.999    | 341.474           |

Table S2. Adjustment results from the t-plot method for all materials. Selecting range: 0.07 to 0.30 p.p<sub>0</sub><sup>-1</sup>.

|                  | Slope  | Intercept | R     | Micropore Area/m <sup>2</sup> .g <sup>-1</sup> | External Area/m <sup>2</sup> .g <sup>-1</sup> | Micropore Volume/cm <sup>3</sup> .g <sup>-1</sup> |
|------------------|--------|-----------|-------|------------------------------------------------|-----------------------------------------------|---------------------------------------------------|
| <b>Blank_800</b> | 0.102  | -0.257    | 0.999 | 0                                              | 0.993                                         | 0                                                 |
| <b>HPC_700</b>   | 40.939 | 58.188    | 0.999 | 198.508                                        | 633.247                                       | 0.090                                             |
| <b>HPC_800</b>   | 42.54  | 52.310    | 0.999 | 179.092                                        | 656.687                                       | 0.081                                             |
| <b>HPC_900</b>   | 38.157 | 50.497    | 0.999 | 174.240                                        | 590.216                                       | 0.078                                             |

Table S3. Elemental analysis obtained by EDS of the synthesized materials.

| Sample           | %C    | %O    | %Fe  | %Si  | %K   | %Zn  | %Cl  | %S   | %Ca  | %Al  |
|------------------|-------|-------|------|------|------|------|------|------|------|------|
| <b>Blank_800</b> | 72.60 | 18.00 | 3.20 | 1.52 | 1.78 | 0.30 | 1.14 | 0.12 | 1.02 | 0.32 |
| <b>HPC_700</b>   | 84.03 | 7.47  | -    | 1.50 | 0.14 | 2.28 | 3.70 | 0.44 | 0.18 | -    |
| <b>HPC_800</b>   | 84.88 | 13.02 | -    | 0.32 | -    | 0.58 | 0.88 | 0.23 | -    | 0.09 |
| <b>HPC_900</b>   | 86.58 | 10.79 | -    | 0.30 | -    | 0.54 | 1.40 | 0.28 | -    | 0.12 |

By %w:w

Table S4. Carbon, Nitrogen, Hydrogen and sulfur contents obtained by elemental analysis.

| Sample         | %C           | %N          | %H          | %S          |
|----------------|--------------|-------------|-------------|-------------|
| <b>Bio-oil</b> | 58.34 ± 0.34 | 1.10 ± 0,01 | 6.72 ± 0.04 | 0.16 ± 0,01 |

Table S5. Band D, G and I<sub>D</sub>/I<sub>G</sub> ratio values for all materials obtained.

| Sample           | D band/cm <sup>-1</sup> | G band/cm <sup>-1</sup> | I <sub>D</sub> /I <sub>G</sub> |
|------------------|-------------------------|-------------------------|--------------------------------|
| <b>Blank_800</b> | 1351                    | 1585                    | 0.94                           |
| <b>HPC_700</b>   | 1328                    | 1586                    | 1.21                           |
| <b>HPC_800</b>   | 1328                    | 1585                    | 1.26                           |
| <b>HPC_900</b>   | 1327                    | 1586                    | 1.32                           |

Table S6 D and G Band values, ID/IG ratio, and statistical parameters by Lorentz adjustment of HPCs synthesized from bio-oil.

| Sample    | D Band /cm <sup>-1</sup> | G Band/cm <sup>-1</sup> | I <sub>D</sub> /I <sub>G</sub> | R <sup>2</sup> | X <sup>2</sup> |
|-----------|--------------------------|-------------------------|--------------------------------|----------------|----------------|
| Blank_800 | 1337                     | 1573                    | 1.64                           | 0.999          | 237.900        |
| HPC_700   | 1327                     | 1571                    | 2.75                           | 0.999          | 46.850         |
| HPC_800   | 1326                     | 1570                    | 3.04                           | 0.999          | 46.005         |
| HPC_900   | 1324                     | 1572                    | 3.54                           | 0.999          | 15.091         |

Table S7 Results of mathematical adjustments obtained from the adsorption kinetics of contaminants.

| Sample  | Contaminant | Pseudo-First-Order (PFO)                                                                              | PseudoSecond-Order (PSO)                                                                              | Elovich                                                                                     |
|---------|-------------|-------------------------------------------------------------------------------------------------------|-------------------------------------------------------------------------------------------------------|---------------------------------------------------------------------------------------------|
| HPC_700 | Caffeine    | R <sup>2</sup> = 0.991<br>X <sup>2</sup> = 0.051<br>q <sub>e</sub> = 8.638<br>k <sub>1</sub> = 2.095  | R <sup>2</sup> = 0.993<br>X <sup>2</sup> = 0.039<br>q <sub>e</sub> = 8.694<br>k <sub>2</sub> = 0.752  | R <sup>2</sup> = 0.984<br>X <sup>2</sup> = 0.087<br>α = 3.492x10 <sup>28</sup><br>β = 8.395 |
|         | Paracetamol | R <sup>2</sup> = 0.984<br>X <sup>2</sup> = 0.126<br>q <sub>e</sub> = 10.248<br>k <sub>1</sub> = 1.538 | R <sup>2</sup> = 0.995<br>X <sup>2</sup> = 0.033<br>q <sub>e</sub> = 10.394<br>k <sub>2</sub> = 0.300 | R <sup>2</sup> = 0.983<br>X <sup>2</sup> = 0.138<br>α = 8.48x10 <sup>11</sup><br>β = 3.229  |
| HPC_800 | Caffeine    | R <sup>2</sup> = 0.972<br>X <sup>2</sup> = 0.051<br>q <sub>e</sub> = 8.304<br>k <sub>1</sub> = 0.242  | R <sup>2</sup> = 0.992<br>X <sup>2</sup> = 0.0051<br>q <sub>e</sub> = 8.576<br>k <sub>2</sub> = 0.054 | R <sup>2</sup> = 0.885<br>X <sup>2</sup> = 0.800<br>α = 573.11<br>β = 1.409                 |
|         | Paracetamol | R <sup>2</sup> = 0.927<br>X <sup>2</sup> = 0.732<br>q <sub>e</sub> = 9.923<br>k <sub>1</sub> = 0.185  | R <sup>2</sup> = 0.975<br>X <sup>2</sup> = 0.251<br>q <sub>e</sub> = 10.265<br>k <sub>2</sub> = 0.034 | R <sup>2</sup> = 0.913<br>X <sup>2</sup> = 0.868<br>α = 238.76<br>β = 1.068                 |
| HPC_900 | Caffeine    | R <sup>2</sup> = 0.983<br>X <sup>2</sup> = 0.101<br>q <sub>e</sub> = 8.291<br>k <sub>1</sub> = 0.584  | R <sup>2</sup> = 0.992<br>X <sup>2</sup> = 0.048<br>q <sub>e</sub> = 8.538<br>k <sub>2</sub> = 0.113  | R <sup>2</sup> = 0.898<br>X <sup>2</sup> = 0.636<br>α = 7.81x10 <sup>4</sup><br>β = 2.016   |
|         | Paracetamol | R <sup>2</sup> = 0.974<br>X <sup>2</sup> = 0.276<br>q <sub>e</sub> = 10.339<br>k <sub>1</sub> = 0.248 | R <sup>2</sup> = 0.987<br>X <sup>2</sup> = 0.145<br>q <sub>e</sub> = 10.649<br>k <sub>2</sub> = 0.046 | R <sup>2</sup> = 0.869<br>X <sup>2</sup> = 1.404<br>α = 1139.1<br>β = 1.183                 |

R<sup>2</sup>: correlation coefficient. X<sup>2</sup>: Nonlinear Chi Square Test. k<sub>1</sub>: pseudo first-order constant (min<sup>-1</sup>). k<sub>2</sub>: pseudo second-order constant (g mg<sup>-1</sup> min<sup>-1</sup>); q<sub>e</sub>: amount adsorbed at equilibrium (mg.g<sup>-1</sup>). α: Elovich constant (mg g<sup>-1</sup> min<sup>-1</sup>). β: Elovich constant (g.mg<sup>-1</sup>).

Table S8 Results of mathematical adjustments obtained from the adsorption isotherms of contaminants.

| Sample  | Contaminant | Langmuir                                                            | Freundlich                                                           | Sips                                                                                                    |
|---------|-------------|---------------------------------------------------------------------|----------------------------------------------------------------------|---------------------------------------------------------------------------------------------------------|
| HPC_700 | Paracetamol | $R^2 = 0.945$<br>$X^2 = 134.70$<br>$q_m = 140.25$<br>$K_L = 0.067$  | $R^2 = 0.931$<br>$X^2 = 167.79$<br>$1/n_F = 0.225$<br>$K_F = 34.956$ | $R^2 = 0.987$<br>$X^2 = 30.02$<br><b><math>q_m = 173.74</math></b><br>$K_S = 0.153$<br>$1/n_S = 0.538$  |
|         | Caffeine    | $R^2 = 0.957$<br>$X^2 = 128.02$<br>$q_m = 150.09$<br>$K_L = 0.051$  | $R^2 = 0.929$<br>$X^2 = 211.32$<br>$1/n_F = 0.246$<br>$K_F = 31.699$ | $R^2 = 0.980$<br>$X^2 = 59.04$<br><b><math>q_m = 176.31</math></b><br>$K_S = 0.111$<br>$1/n_S = 0.617$  |
| HPC_800 | Paracetamol | $R^2 = 0.946$<br>$X^2 = 258.84$<br>$q_m = 168.02$<br>$K_L = 0.046$  | $R^2 = 0.984$<br>$X^2 = 73.02$<br>$1/n_F = 0.252$<br>$K_F = 37.526$  | $R^2 = 0.995$<br>$X^2 = 24.20$<br><b><math>q_m = 309.82</math></b><br>$K_S = 0.106$<br>$1/n_S = 0.417$  |
|         | Caffeine    | $R^2 = 0.962$<br>$X^2 = 112.44$<br>$q_m = 154.16$<br>$K_L = 0.075$  | $R^2 = 0.903$<br>$X^2 = 286.18$<br>$1/n_F = 0.225$<br>$K_F = 37.785$ | $R^2 = 0.975$<br>$X^2 = 79.76$<br><b><math>q_m = 169.14</math></b><br>$K_S = 0.127$<br>$1/n_S = 0.695$  |
| HPC_900 | Paracetamol | $R^2 = 0.903$<br>$X^2 = 537.181$<br>$q_m = 187.66$<br>$K_L = 0.086$ | $R^2 = 0.956$<br>$X^2 = 240.50$<br>$1/n_F = 5.054$<br>$K_F = 51.847$ | $R^2 = 0.977$<br>$X^2 = 132.14$<br><b><math>q_m = 279.96</math></b><br>$K_S = 0.183$<br>$1/n_S = 2.660$ |
|         | Caffeine    | $R^2 = 0.975$<br>$X^2 = 82.18$<br>$q_m = 170.88$<br>$K_L = 0.152$   | $R^2 = 0.902$<br>$X^2 = 322.95$<br>$1/n_F = 0.188$<br>$K_F = 53.879$ | $R^2 = 0.984$<br>$X^2 = 51.80$<br><b><math>q_m = 183.31</math></b><br>$K_S = 0.206$<br>$1/n_S = 0.700$  |

$R^2$ : correlation coefficient.  $X^2$ : Nonlinear Chi Square Test.  $q_m$ : maximum adsorption capacity ( $\text{mg.g}^{-1}$ ).  $K_L$ : Langmuir constant ( $\text{L.mg}^{-1}$ ).  $K_F$ : Freundlich constant ( $\text{mg}^{(1-1/n)} \text{L}^{1/n} \text{g}^{-1}$ ) e  $1/n_F$ : constant related to surface heterogeneity.  $1/n_S$ : Sips constant (dimensionless). e  $K_S$ : Sips adsorption constant ( $\text{L.mg}^{-1})^{1/n_S}$ .

## Figures

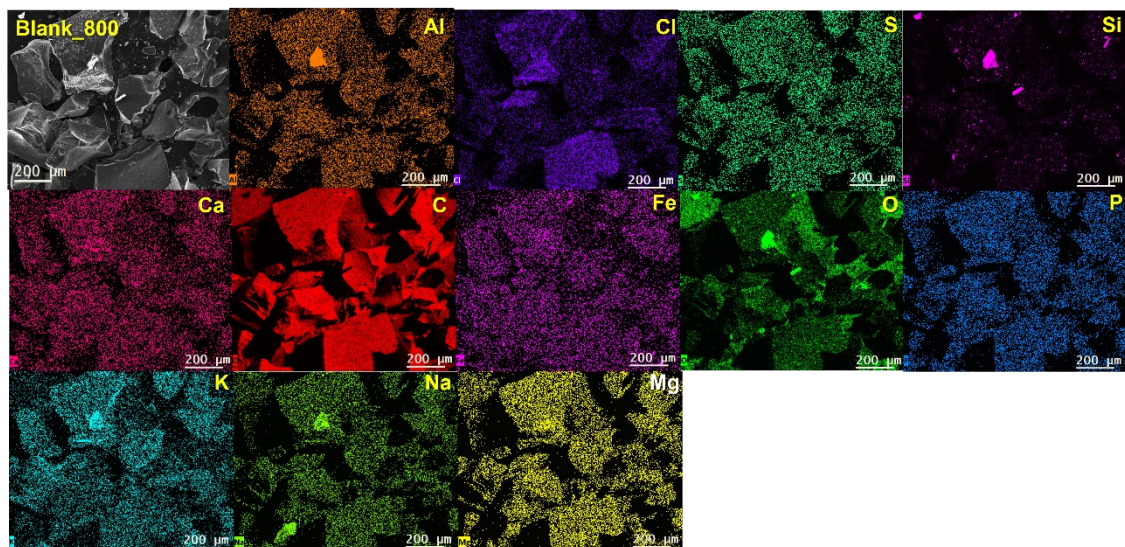

Figure S3 SEM-EDS elemental mapping of Blank\_800.

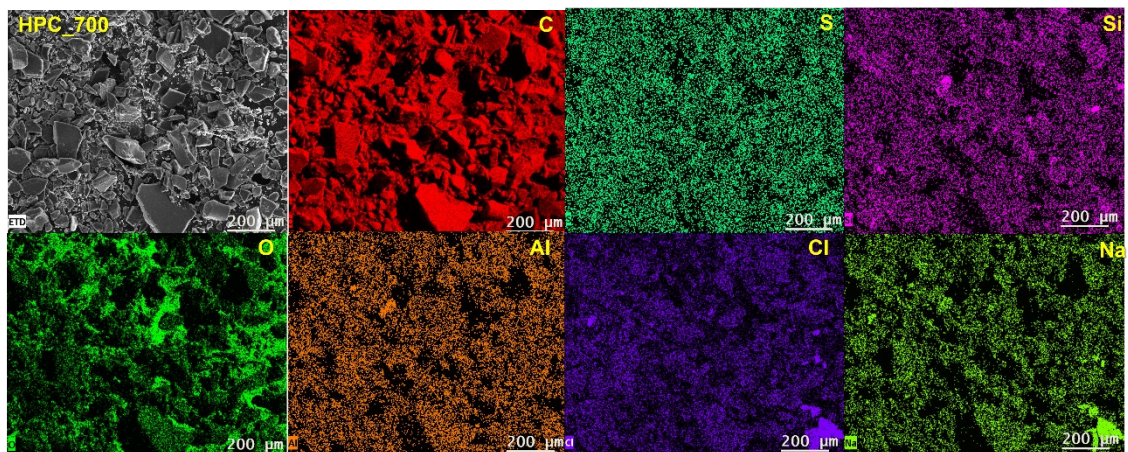

Figure S4 SEM-EDS elemental mapping of HPC\_700.

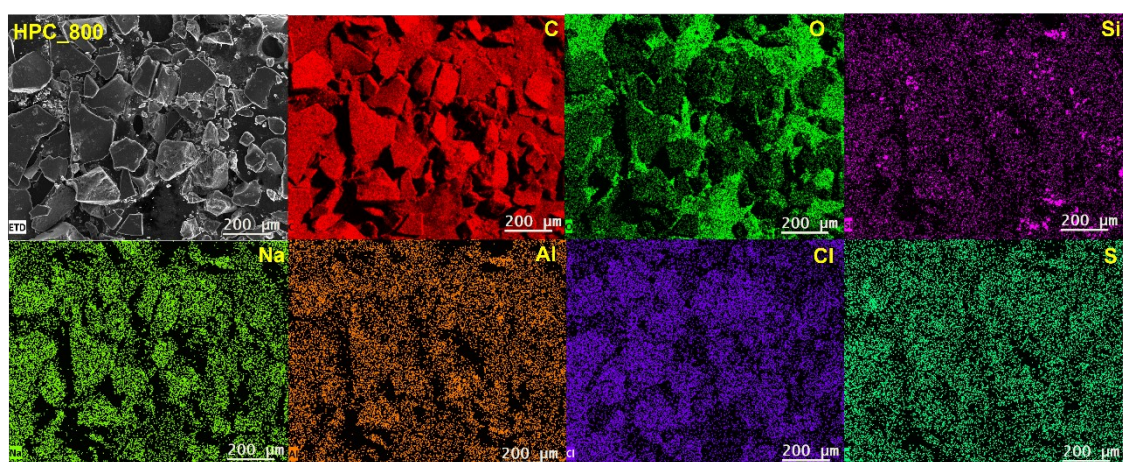

Figure S5 SEM-EDS elemental mapping of HPC\_800.

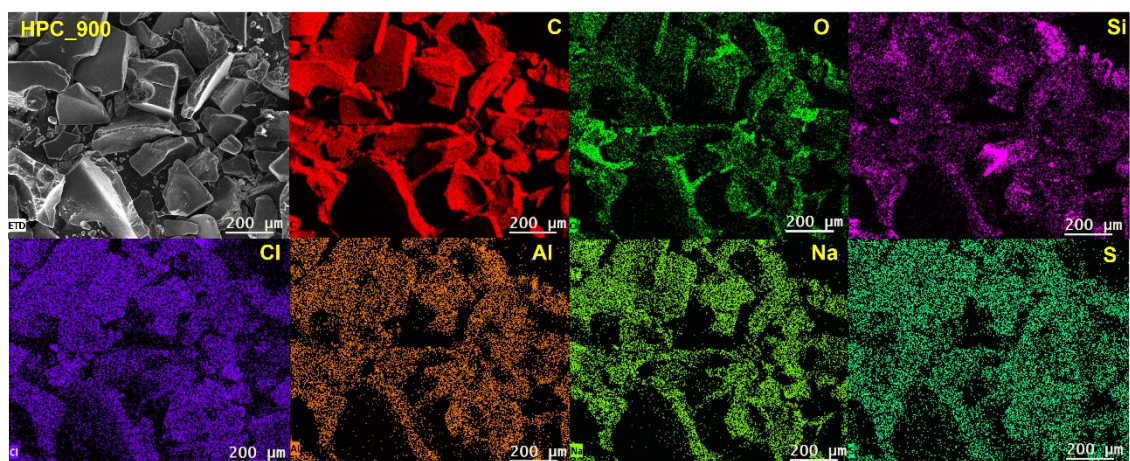

Figure S6 SEM-EDS elemental mapping of HPC\_900.

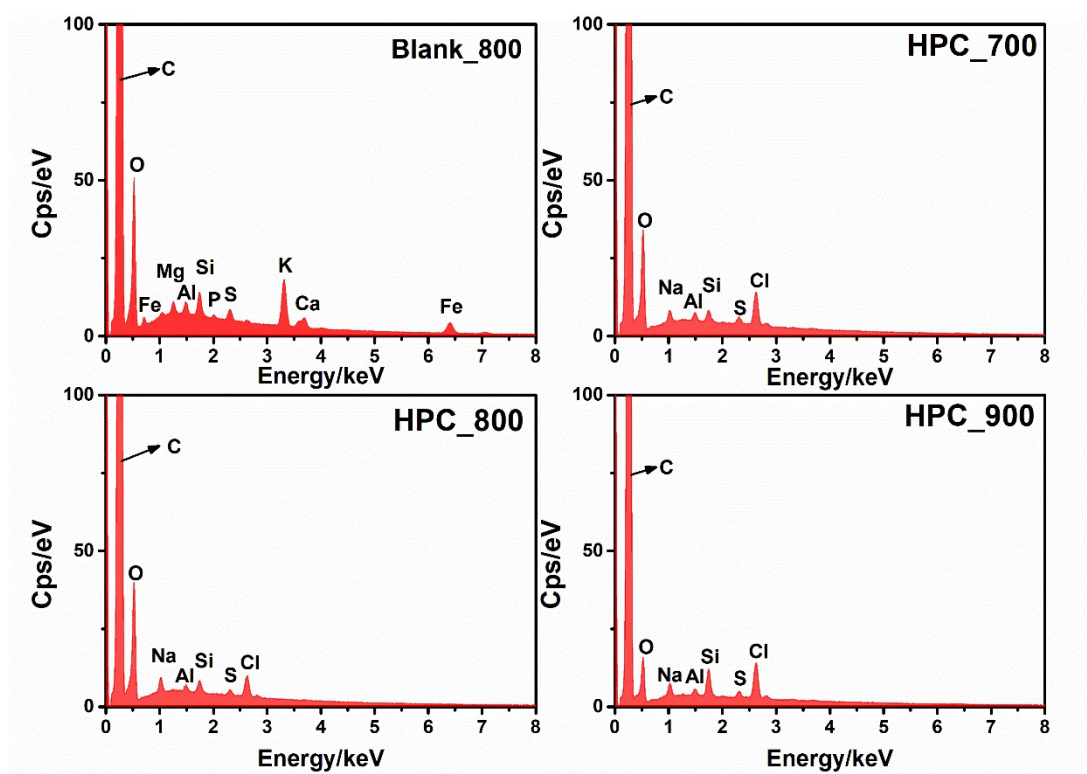

Figure S7 EDS spectra of synthesized materials.

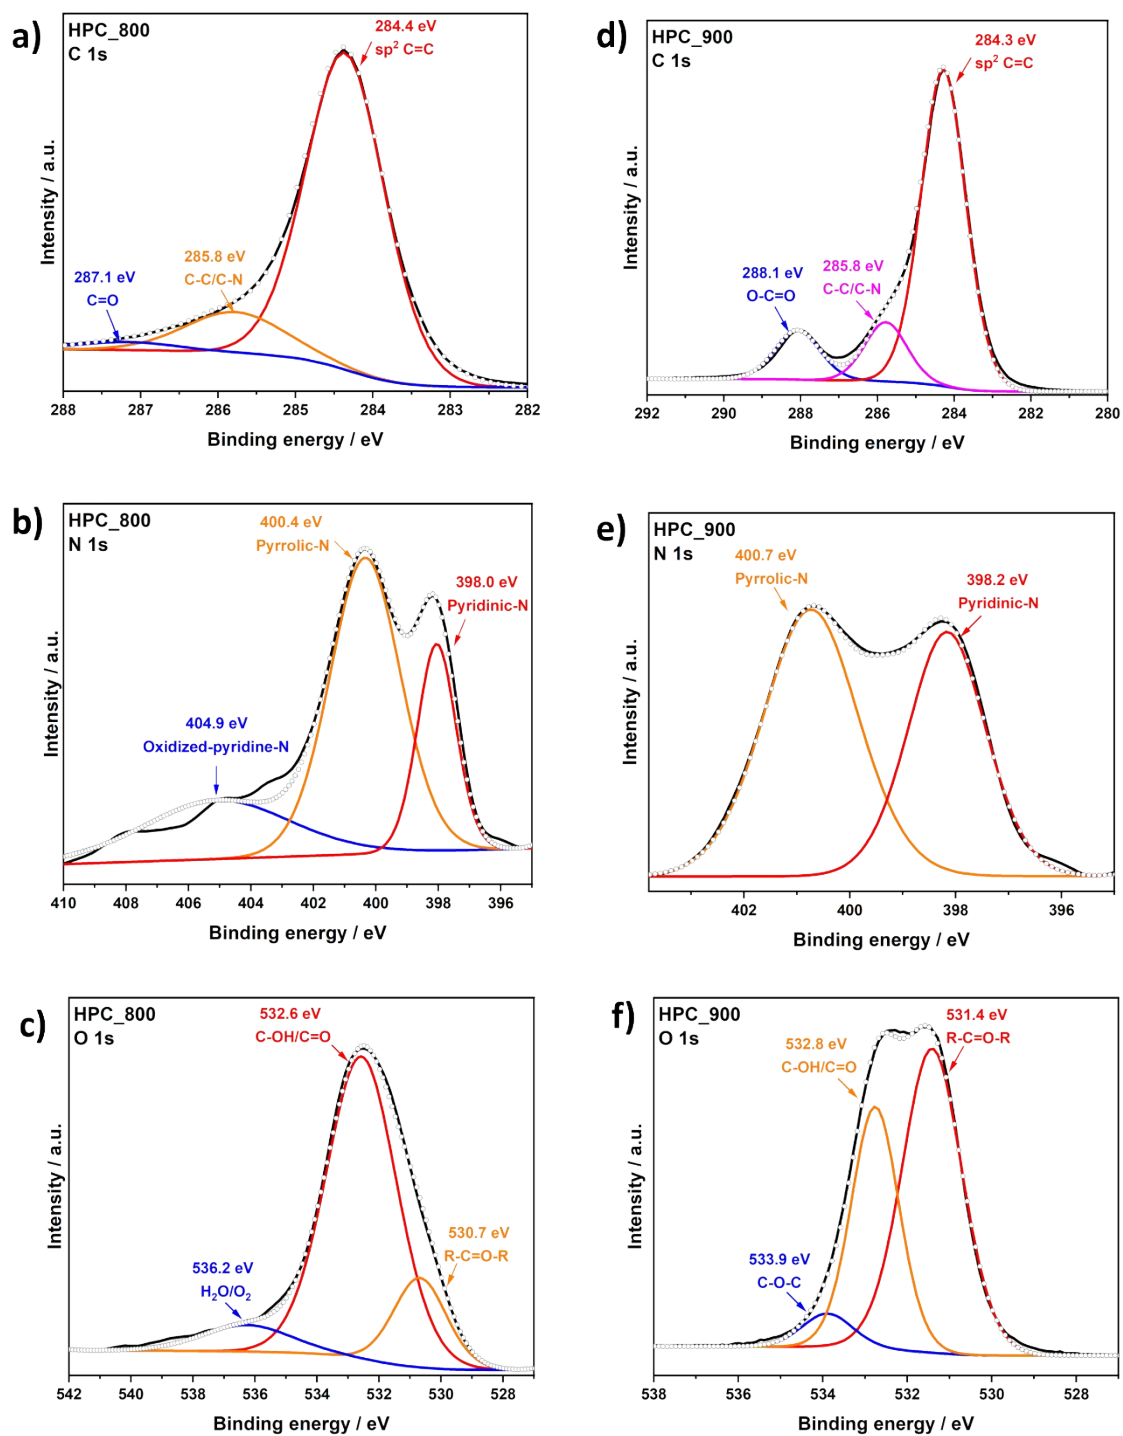

Figure S8 XPS spectra of synthesized materials (a-c) HPC\_800 and (d-f) HPC\_900.

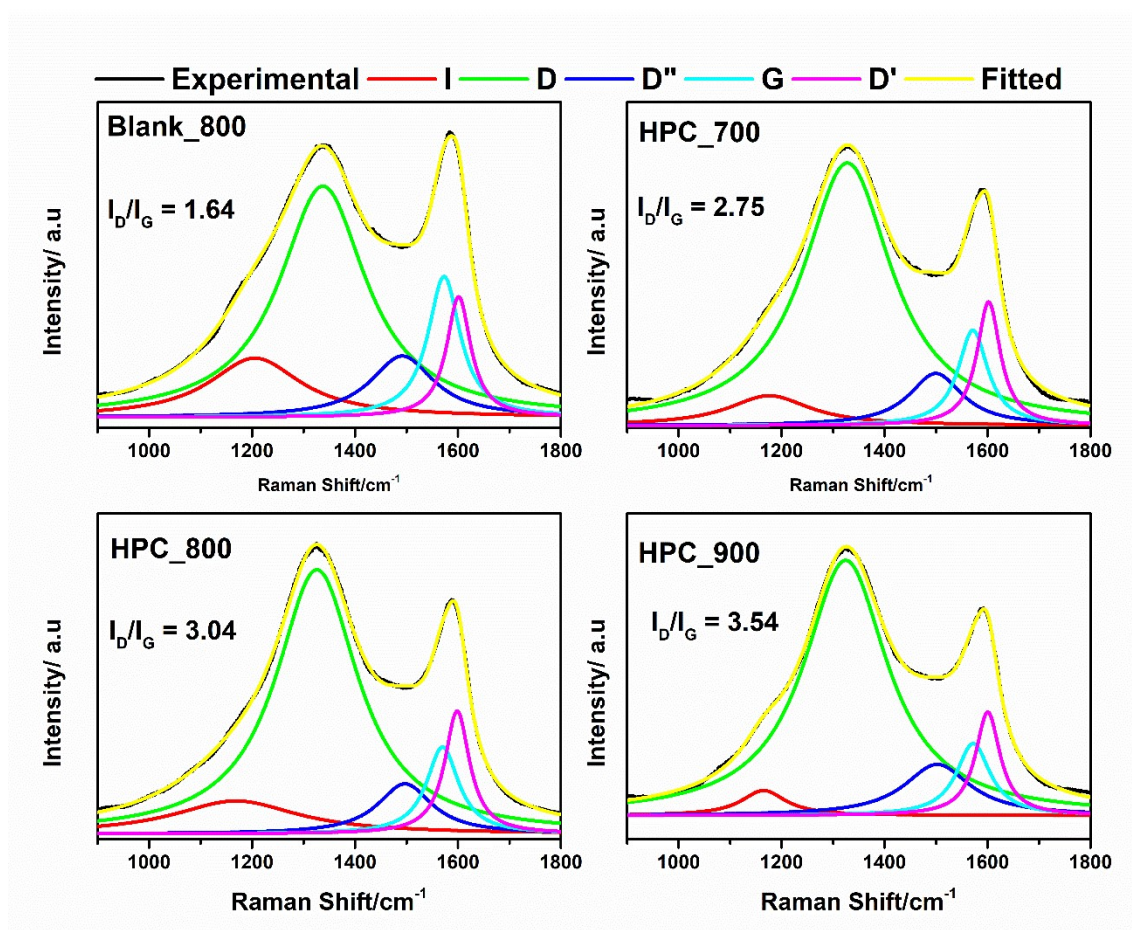

Figure S9 Raman spectra after deconvolution performed by Lorentz fit for HPC materials produced from bio-oil.

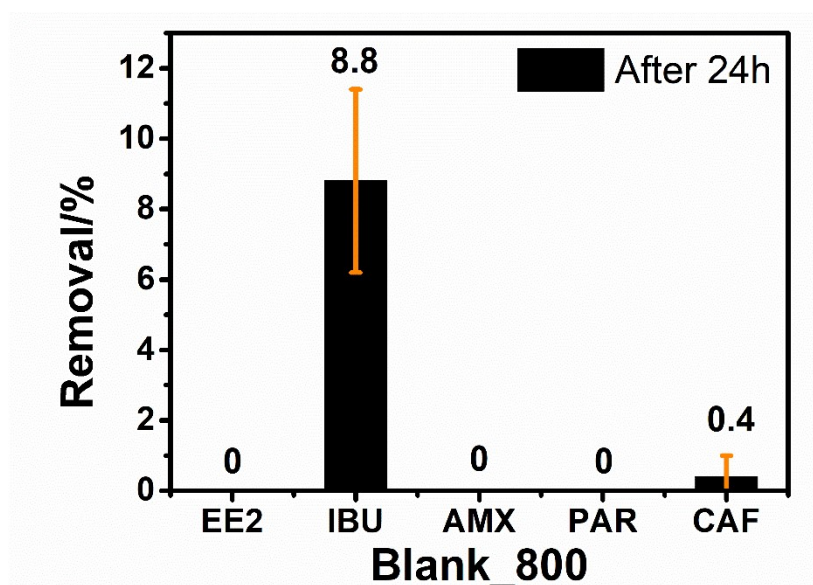

Figure S10 Evaluation of removals using Blank\_800 as adsorbent in contact tests with contaminants: paracetamol (PAR), caffeine (CAF), ibuprofen (IBU), amoxicillin (AMX) and 17 $\alpha$ -ethinylestradiol (EE2).

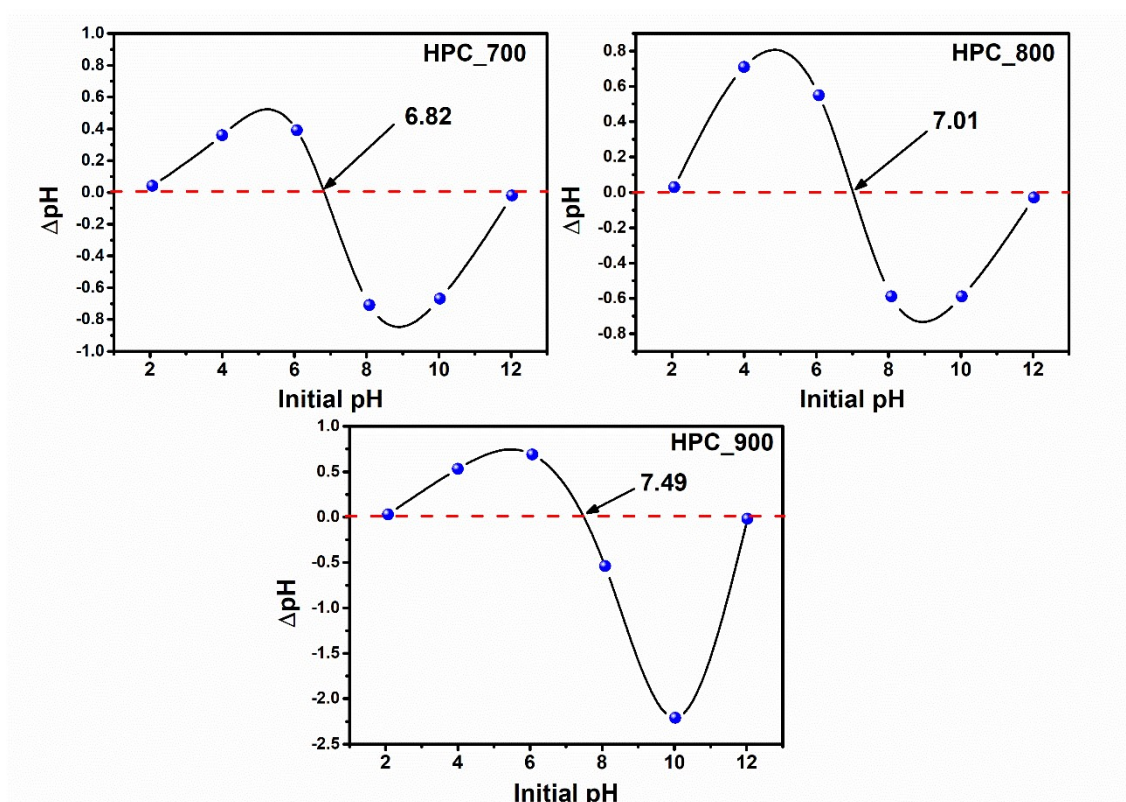

Figure S11 PCZ experiments performed on the synthesized HPC\_T.

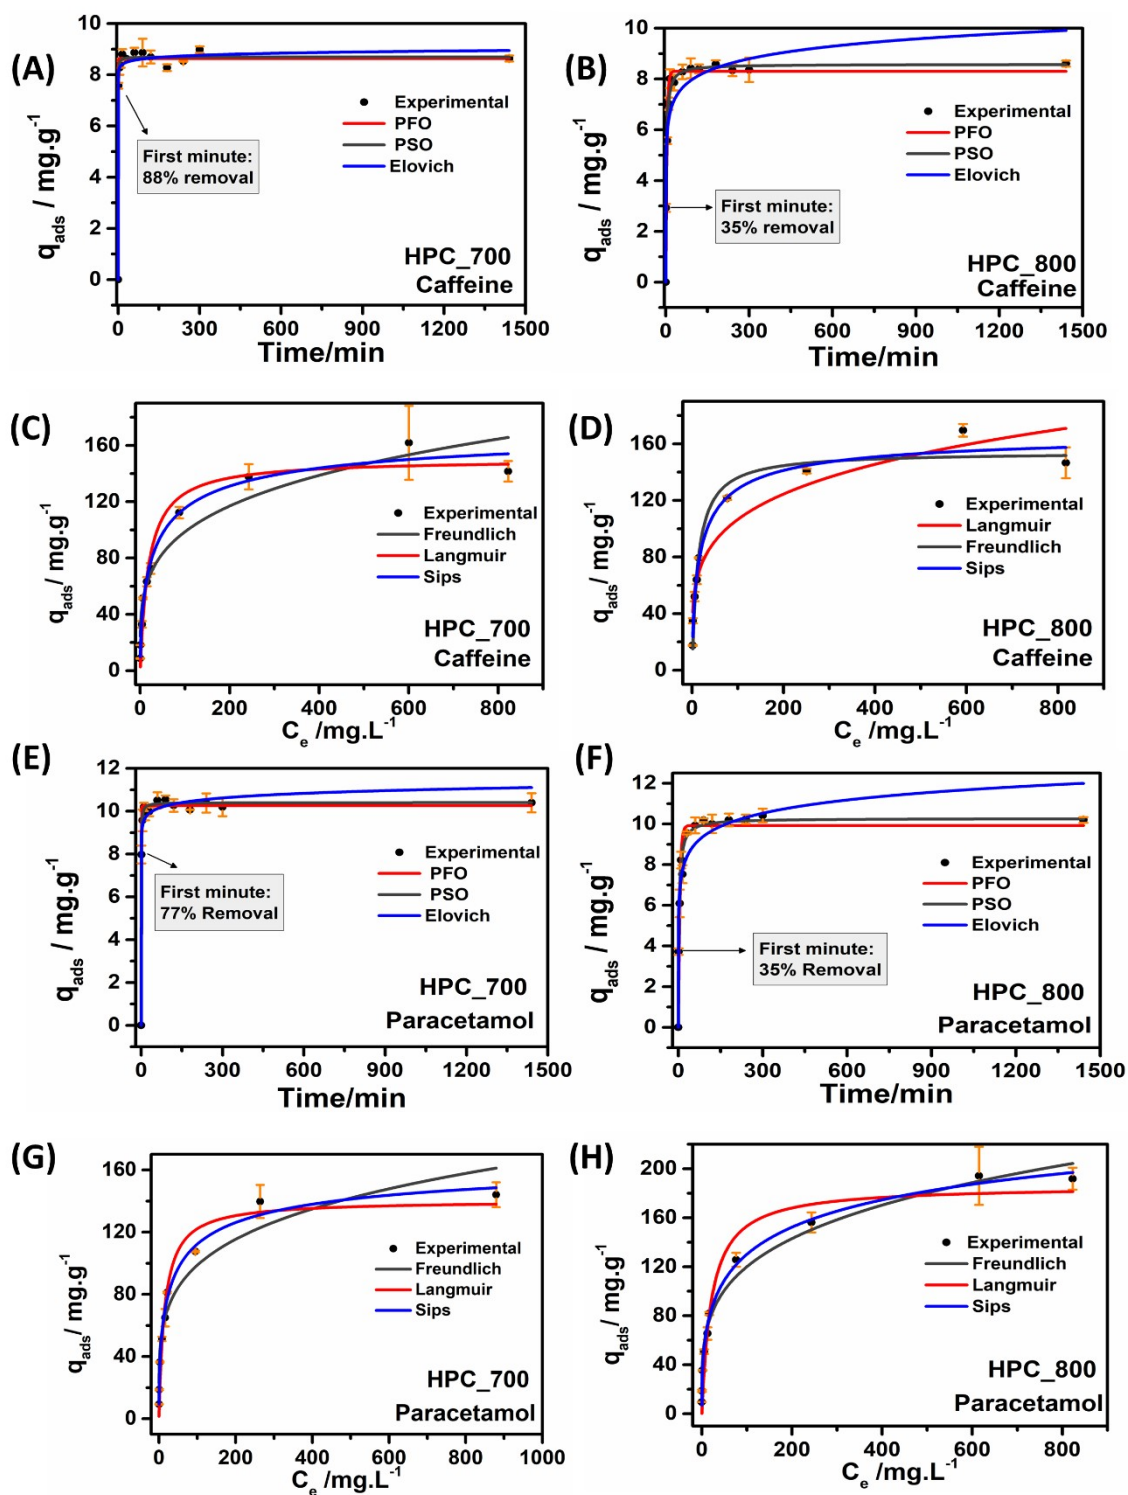

Figure S12 Caffeine adsorption kinetic curve using as adsorbent: HPC\_700. HPC\_800 (a-b) respectively. Caffeine adsorption isotherms using as adsorbent: HPC\_700. HPC\_800 (c-d) respectively. Paracetamol adsorption kinetic curve using as adsorbent: HPC\_700. HPC\_800 (e-f) respectively. Paracetamol adsorption isotherms using as adsorbent: HPC\_700 and HPC\_800 (g-h) respectively.

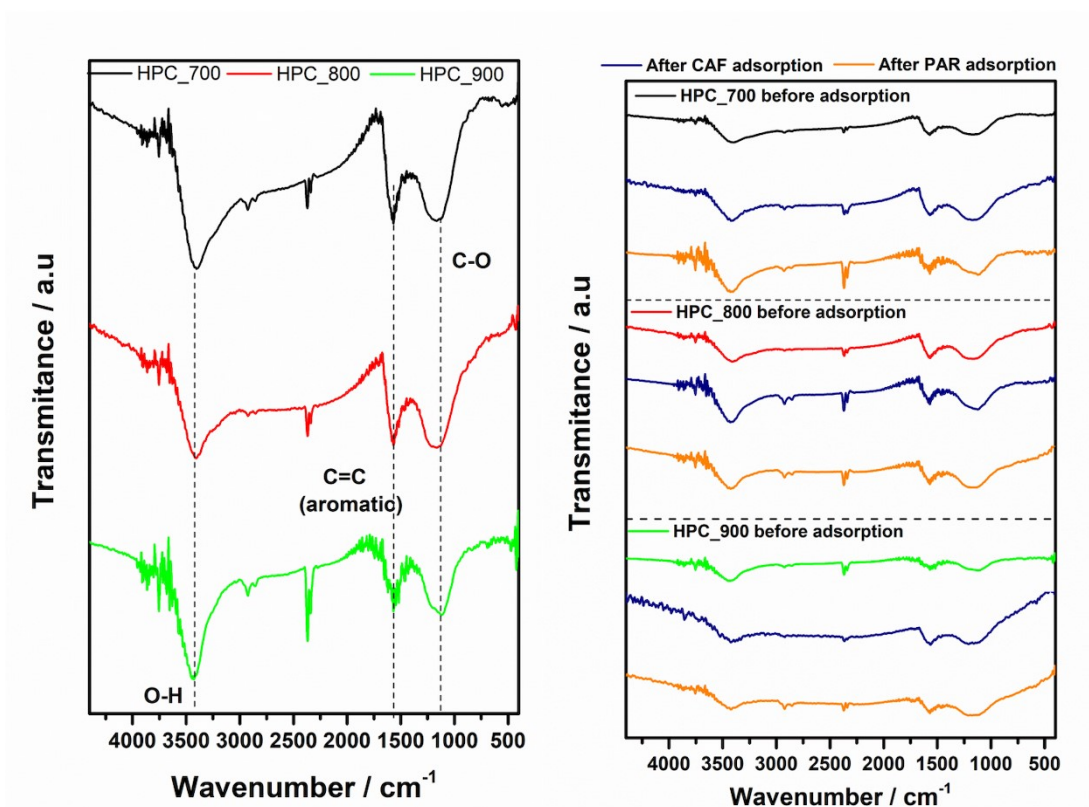

Figure S13. FTIR spectra of HPC\_T synthesized (a) and HPC\_T before and after adsorption of contaminants (PAR and CAF).

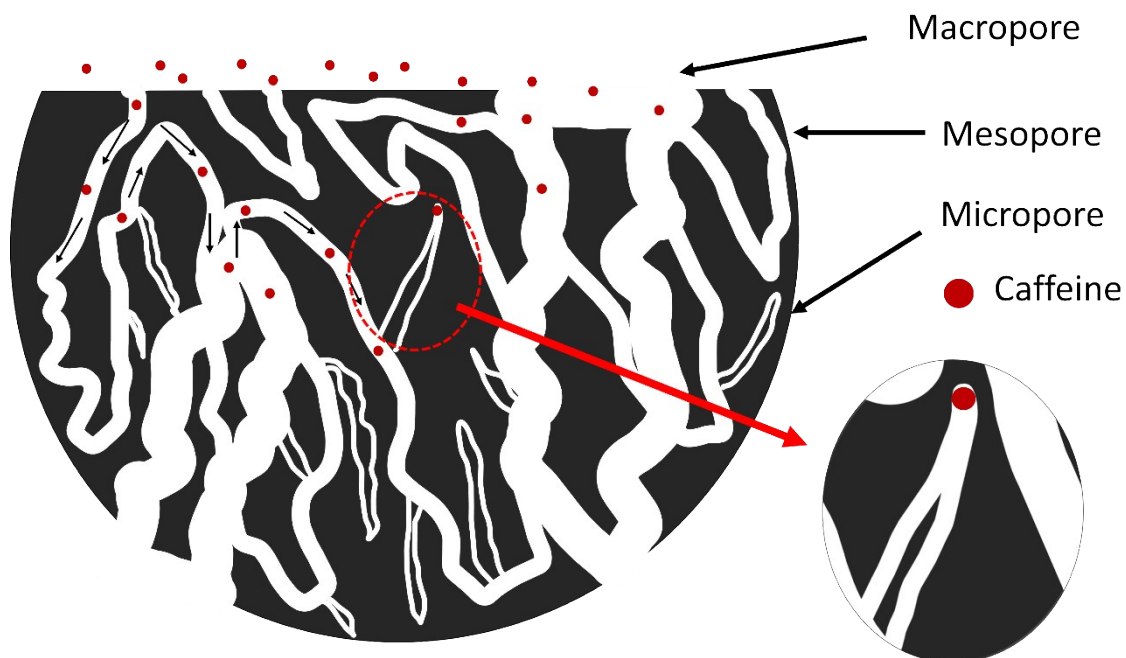

Figure S14 A schematic representation of the caffeine diffusion process through the pore network of HPC\_T until its adsorption within the micropores.

#### 4. References

- 1 E. D. Revellame, D. L. Fortela, W. Sharp, R. Hernandez and M. E. Zappi, *Clean. Eng. Technol.*, 2020, **1**, 100032.
- 2 L. Largitte and R. Pasquier, *Chem. Eng. Res. Des.*, 2016, **109**, 495–504.
- 3 F. S. Freyria, F. Sannino and B. Bonelli, *Nanomater. Detect. Remov. Wastewater Pollut.*, 2020, 19–46.
- 4 T. R. Sahoo and B. Prelot, *Nanomater. Detect. Remov. Wastewater Pollut.*, 2020, 161–222.
- 5 S. Azizian, *J. Colloid Interface Sci.*, 2004, **276**, 47–52.
- 6 J. P. Simonin, *Chem. Eng. J.*, 2016, **300**, 254–263.
- 7 K. Y. Foo and B. H. Hameed, *Chem. Eng. J.*, 2010, **156**, 2–10.
- 8 J. Wang and X. Guo, *Chemosphere*, 2020, **258**, 127279.
- 9 M. A. Al-Ghouti and D. A. Da'ana, *J. Hazard. Mater.*, 2020, **393**, 122383.
